# Supplementary material for: Pharmacy-faculty work-life balance and career satisfaction: Comparison of national survey results from 2012 and 2018
Source: PubMed Central journal article supplement — Explor Res Clin Soc Pharm. 2022 Feb 7;5:100112. doi: 10.1016/j.rcsop.2022.100112 (PMC9031084; doi:10.1016/j.rcsop.2022.100112), 2022-02-07
Supplement: mmc1.pdf [file mmc1.pdf]

## Default Question Block

Touro University California College of Pharmacy is conducting a five-year follow up to a web-based research survey. The goals of this survey study are to gain a better understanding of lifestyle, stress coping mechanisms and work-place satisfaction among pharmacy graduate and professional school faculty in the United States.

### Protection of Anonymity and Consent for Research:

This survey is voluntary and completely anonymous. Your responses will be collected on a dedicated, secure server at Touro University and will not be connected to any potentially identifying information including IP address of the computer. By submitting responses, you are providing consent to the use of your responses in this research project.

Please answer the following questions as honestly and precisely as possible. Thank you.

Any questions regarding the study can be directed to:

Tristan Lindfelt, Pharm.D., BCPS, BCACP, BCOP

Associate Professor of Clinical Sciences Touro University California College of Pharmacy

Tristan.Lindfelt@tu.edu.

If you have any questions, concerns, or reports regarding your rights as a participant of research, please contact the IRB Chair at Touro University at (707) 638-5236 or [Ted.Wong@tu.edu](mailto:Ted.Wong@tu.edu).

Do you want to continue?

- Yes
- No

Is your graduate/professional program at a private or public institution?

- Private
- Public

What is your current academic rank?

- Assistant Professor
- Associate Professor
- Full Professor
- Adjunct Assistant/Associate/Full Professor
- Instructor
- Lecturer
- Other

What is your current faculty appointment status?

- Full-time
- Part-time
- Without salary faculty

Which of the following best describes your current position?

- Tenure track
- Non-tenure track
- Other or don't know

What department are you currently most closely associated with?

- Continual Professional Education
- Libraries/ Educational Resources
- Liberal Arts
- Management
- Medicinal Chemistry/ Pharmaceutical Chemistry/ Pharmacognosy
- Pharmaceuticals/ Pharmacy
- Pharmacology/ Biological Science
- Pharmacy Practice

Social and Administrative Science

## Gender

- Male
- Female
- Other

## What is your age?

- 20-24
- 25-29
- 30-34
- 35-39
- 40-44
- 45-49
- 50-54
- 55-59
- 60-64
- 65-69
- 70-74
- 75 or older

## How would you describe yourself?

- American Indian or Alaskan Native
- Asian or Pacific Islander
- Black, not of Hispanic origin
- Hispanic
- White, not of Hispanic origin
- Middle Eastern
- Other

What is your marital status?

- Single
- Married
- Divorced/Separated
- Living with partner
- Widowed
- Other

How many children do you currently have living in your household?

- 0
- 1
- 2
- 3
- 4 or more

Is your current institution your first place of employment in pharmacy academia?

- Yes
- No

How many years out of your entire career have you worked in pharmacy academia?

- Less than 5
- 5-9 years
- 10-14 years
- 15-19 years
- 20 or more years

Are you currently serving as a department chair?

- Yes
- No

Are you currently serving as a committee chair? (e.g. curriculum, admissions, academic standards, rank and promotion, etc.)

- Yes
- No

On average, how many hours per week do you work (inclusive of all academic work commitments)?

- Less than 10 hours per week
- 10 hours to 19 hours per week
- 20 hours to 29 hours per week
- 30 hours to 39 hours per week
- 40 hours to 49 hours per week
- 50 to 59 hours per week
- 60 hours or more per week

Approximately how long is your average daily commute time to work (one-way only)?

- Less than 15 minutes
- 15 to 29 minutes
- 30 to 44 minutes
- 45 to 59 minutes
- 60 to 74 minutes
- 75 to 99 minutes
- 100 to 114 minutes
- 115 to 129 minutes
-

130 minutes or more

How satisfied are you with your current position in academia?

- Not at all satisfied
- Slightly satisfied
- Somewhat satisfied
- Very satisfied
- Extremely satisfied

How satisfied are you with your current balance between work, family, and social life?

- Not at all satisfied
- Slightly satisfied
- Somewhat satisfied
- Very satisfied
- Extremely satisfied

Do you plan on staying in academia for the remainder of your career?

- Yes
- No
- Undecided

What are your future employment intentions over the next 2 years?

- Stay at my current institution
- Leave my current institution
- Leave academia altogether

On average, how many hours of sleep do you get per night?

- Less than 3 hours
- 3.5 hours
- 4 hours
- 4.5 hours
- 5 hours
- 5.5 hours
- 6 hours
- 6.5 hours
- 7 hours
- 7.5 hours
- 8 hours
- 8.5 hours
- 9 hours
- 9.5 hours
- 10 hours or more

How much exercise/physical activity do you get per week ?

- None
- 30 minutes
- 60 minutes
- 90 minutes
- 120 minutes
- 150 minutes
- 180 minutes
- 210 minutes
- 240 minutes
- 270 minutes
- 300 minutes
- 330 minutes
- 360 minutes
- 390 minutes
- 420 minutes

450 minutes or more

What part of your working day is spent sitting?

- Almost none of the time
- 25% of the time
- 50% of the time
- 75% of the time
- Almost all of the time

What is your approximate height?

What is your approximate weight in pounds (lbs)? Please round to the nearest 5 lb increment.

How do you handle stress? Please select all that apply.

- Watching television
- Playing video/computer games
- Using social media (Facebook, Instagram, Twitter, etc.)
- Eating
- Talking with friend/family member
- Talking with significant other
- Consuming alcohol
- Using illicit drugs
- Using prescription medications inappropriately
- Being destructive (i.e. - punch walls; break something)
- Taking a nap/sleep



- Listening to music/playing a musical instrument
- Cooking/baking
- Exercising/play sports
- Meditating/deep breathing/yoga
- Gardening
- Shopping
- Hiking
- Consulting with psychiatrist; psychologist; therapist
- Other
- Nothing

How often do you procrastinate on your projects, duties, assignments?

- Always
- Very often
- Sometimes
- Rarely

In the past 24 months, how many peer-reviewed publications have you had published (count any authorship position)

In the past 12 months, have you witnessed physical or verbal abuse in the pharmacy academia workplace?

- Yes
- No

In the past 12 months, have you witnessed bullying in the pharmacy academia workplace?

- Yes
-

No

In the past 12 months, have you experienced physical or verbal abuse in the pharmacy academia workplace?

- Yes
- No

In the past 12 months, have you experienced bullying in the pharmacy academia workplace?

- Yes
- No

In the last month, how often have you been upset because of something that happened unexpectedly?

- Never
- Almost never
- Sometimes
- Fairly often
- Very often

In the last month, how often have you felt you were unable to control the important things in your life?

- Never
- Almost never
- Sometimes
- Fairly often
- Very often

In the last month, how often have you felt nervous or "stressed"?

- Never

- Almost never
- Sometimes
- Fairly often
- Very often

In the last month, how often have you felt confident about your ability to handle your personal problems?

- Never
- Almost never
- Sometimes
- Fairly often
- Very often

In the last month, how often have you felt that things were going your way?

- Never
- Almost never
- Sometimes
- Fairly often
- Very often

In the last month, how often have you found that you could not cope with all the things that you had to do?

- Never
- Almost never
- Sometimes
- Fairly often
- Very often

In the last month, how often have you been able to control irritations in your life?

- Never
- Almost never
- Sometimes
- Fairly often
- Very often

In the last month, how often have you felt that you were on top of things?

- Never
- Almost never
- Sometimes
- Fairly often
- Very often

In the last month, how often have you been angered because of things that were outside your control?

- Never
- Almost never
- Sometimes
- Fairly often
- Very often

In the last month, how often have you felt difficulties were piling up so high that you could not overcome them?

- Never
- Almost never
- Sometimes
- Fairly often
- Very often

If you had a college aged child, would you encourage them to pursue a career in the pharmacy profession (any area of pharmacy)?

- Yes
- No
- Uncertain

If you had a college aged child, would you encourage them to pursue a career in academia (not necessarily pharmacy academia)?

- Yes
- No
- Uncertain

If you had a college aged child, would you encourage them to pursue a career in pharmacy academia?

- Yes
- No
- Uncertain

Please type any comments regarding this survey or suggestions for improvement here.

Please provide your email address if you would like to be entered into the gift card drawing.

Thank you very much for participating in this survey. Again, your responses are completely anonymous. Please don't hesitate to contact Tristan Lindfelt, Pharm.D. BCPS, BCACP, BCOP with any questions or concerns at [Tristan.Lindfelt@tu.edu](mailto:Tristan.Lindfelt@tu.edu).

Survey Powered By Qualtrics
